# Supplementary material for: Sleep, Behavior, and Adaptive Function in KAT6A Syndrome
Source: MDPI journal article supplement (doi:10.3390/brainsci11080966), 2021-07-23
Supplement: s1 [file s1]

**Table S1.** Individual Participants and Variants.

| Subject | Age | Sex | KAT6A Variant                       |
|---------|-----|-----|-------------------------------------|
| 1       | 10  | M   | c.5212 G>A; p.D1738N                |
| 2       | 3   | F   | c.4664G>A; p.S1555N                 |
| 3       | 9   | F   | c.1862A>G; p.N621S <sup>°</sup>     |
| 4       | 4   | F   | c.1951_1954delCCTC; p.P651fsX47     |
| 5       | 8   | M   | c.693_705del; p.D232VfsX7           |
| 6       | 33  | F   | C.1136C>G; p.S379X                  |
| 7       | 4   | M   | c.3429dupC; p.T1144HfsX31           |
| 8       | 13  | M   | c.3631_3632delGT; p.V1211X          |
| 9       | 18  | F   | c.3230delA; p.N1077MfsX46           |
| 10      | 8   | F   | c.4292dupT; p.L1431FfsX8            |
| 11      | 3   | F   | c.4046_4047delAG p.E1349VfsX6       |
| 12      | 9   | M   | c.3830_3831insTT; p.R1278SfsX17     |
| 13      | 35  | M   | c.3040-1_3040delGA; p.K1014fs       |
| 14      | 10  | F   | c.4228_4232delAAAGA; p.K1410GfsX7   |
| 15      | 4   | M   | c.5645_5646delTTins10; p.V1882GfsX4 |
| 16      | 6   | F   | c.4089_4092dup; p.D1365KfsX3        |
| 17      | 5   | M   | c.3286_3287insC ;p.C1096SfsX6       |
| 18      | 7   | F   | c.4254_4257del; p.E1419WfsX12       |
| 19      | 18  | M   | c.3853_3862del10, p.Q1285RfsX6      |
| 20      | 30  | M   | c.3338C > G; p.S1113X               |
| 21      | 11  | M   | c.3385C>T; p.R1129X                 |
| 22      | 8   | F   | c.3385C>T; p.R1129X                 |
| 23      | 11  | M   | c.3385C>T; p.R1129X                 |
| 24      | 12  | F   | c.4108G>T; p.E1370X                 |
| 25      | 11  | M   | c.3182T>G;p.L1061X                  |
| 26      | 4   | F   | c.3070C>T; p.R1024X                 |

<sup>°</sup> also has benign change c.4952C>T; p.P1651L
